# Supplementary material
Source: publisher figshare collection journal article supplement (https://tandf.figshare.com/ndownloader/files/23613325)
Supplement: Supplementary file 1 [file 23613325]

**Supplementary Figure 1 Themes generated from initial and follow up interviews.**

Initial interviews

Thirteen themes:

1) Parkinson’s diagnosis

2) Parkinson’s symptoms and experience of PwP

3) Reflections on the forthcoming PDSAFE intervention/therapy

4) Previous experience of rehabilitation therapies

5) Effect of PD on day-to-day routines and life

6) Effect of PD on mobility

7) Losses attributed to Parkinson’s

8) Adaptation

9) Falls and risk

10) Well-being and Parkinson’s

11) Other health and social issues

12) Trial and study participation

13) Importance of social networks.

Follow up interviews

Seventeen themes:

1) Activities

2) After the sessions ended

3) Experience of the assessor sessions

4) Barriers to PDSAFE

5) Deteriorating mobility

6) Equipment or technology

7) Experience of physiotherapy and other exercise outside of PDSAFE

8) Facilitators for continuing with the PDSAFE programme

9) Falls

10) Impact and treatment of PD condition

11) Impact of health condition

12) Impact of condition

13) Impact of PDSAFE programme

14) PDSAFE physiotherapy sessions

15) Strategies

16) Therapist input

17) Other
